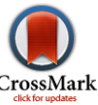

# Activity and Participation Characteristics of Adults with Learning Disabilities - A Systematic Review

Kineret Sharfi\*, Sara Rosenblum

The Laboratory of Complex Human Activity and Participation, Department of Occupational Therapy, Haifa University, Haifa, Israel

## Abstract

**Background:** 'Learning disabilities' (LD) refer to a wide group of neurological disorders caused by deficits in the central nervous system which influence the individual's ability to maintain-, process or convey information to others in an efficient way. A worldwide discussion about the definitions of LD continues while a conceptual framework for studying the diverse life outcomes of adults with LD is still missing.

**Objective:** The aim was to review the literature on the *activity* and *participation* of adults with LD based on the International Classification of Functioning, Disability and Health (ICF) concepts.

**Methods:** "PsychInfo", "Eric" and "PubMed" were searched for relevant literature according to the guidelines of Preferred Reporting Items for Systematic Reviews and Meta-Analyses (PRISMA). After a three-stage process, 62 articles relevant for domains of activity and participation of adults with LD were included in the review.

**Results:** Thirty-two articles focused on the domain of major life areas of education, work and employment and twelve articles focused on the domain of learning and applying knowledge. Limitations in activity and participation of the population with LD in these domains are recognized and discussed. Eighteen additional articles demonstrated that adults with LD confront difficulties in various life domains (e.g., communication, interpersonal interactions, mobility, and domestic life), however literature concerning these domains is scarce.

**Conclusions:** The ICF can be useful for further exploration of activity and participation characteristics of adults with LD in various life domains. Such exploration is required in order to gain a wider perspective of their functional characteristics and daily needs.

**Citation:** Sharfi K, Rosenblum S (2014) Activity and Participation Characteristics of Adults with Learning Disabilities - A Systematic Review. PLoS ONE 9(9): e106657. doi:10.1371/journal.pone.0106657

**Editor:** Stefano Federici, University of Perugia, Italy

**Received:** March 24, 2014; **Accepted:** August 8, 2014; **Published:** September 3, 2014

**Copyright:** © 2014 Sharfi, Rosenblum. This is an open-access article distributed under the terms of the Creative Commons Attribution License, which permits unrestricted use, distribution, and reproduction in any medium, provided the original author and source are credited.

**Data Availability:** The authors confirm that all data underlying the findings are fully available without restriction. All relevant data are within the paper and its Supporting Information files.

**Funding:** This work was supported by the Israeli Ministry of Science and Technology. The funders had no role in study design, data collection and analysis, decision to publish, or preparation of the manuscript.

**Competing Interests:** The authors have declared that no competing interests exist.

\* Email: kineretsharfi@gmail.com

## Introduction

The term "learning disabilities" (LD) refers to a wide group of neurological disorders caused by deficits in the central nervous system which influence the individual's ability to maintain, process or convey information to others in an efficient way (e.g. [1]). The discussion about the definition of LD is continuing worldwide (e.g. [2]) and consequently, the data regarding the prevalence of LD in the total population has also been argued. As far as is known, there is no formal up to date information about the prevalence of LD among adults however each year very large numbers of students with LD leave high school and begin their adult lives, facing a wide variety of challenges leading to a broad array of outcomes [3].

Common definitions of LD (e.g. [4,5]) emphasize a specific nature of the LD and focus on the deficient academic skills [6]. Even though, previous less known definitions of LD have exhibited difficulties in activity and participation in other life domains among people with LD, for example in *work and daily functioning*

[7], *organizational skills, perception, social interaction and life perspective* [8]. The new APA DSM-5 version includes a suggestion to make a diagnosis of LD based on a clinical synthesis of developmental, medical, family, and educational reports [9]. This change may reflect a current understanding of the complicated nature of the LD and the need for gathering comprehensive data on activity and participation of the person in a variety of environments. Qualitative literature also indicates that the daily picture of people with LD includes deficiencies in activity and participation in various life domains such as friendship and dating, partnerships, parenting, and general perception of quality of life (e.g. [10]).

Further complexity of the issue of LD is caused due to a high co-occurrence of the LD with other associated disorders, for example: Attention Deficit/Hyperactivity Disorder (ADD/ADHD) (e.g. [11]); Developmental Coordination Disorder (DCD) (e.g. [12]); Difficulties in social skills (e.g. [13]); Depression and anxiety disorders (e.g. [14]). Some investigators included people with

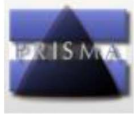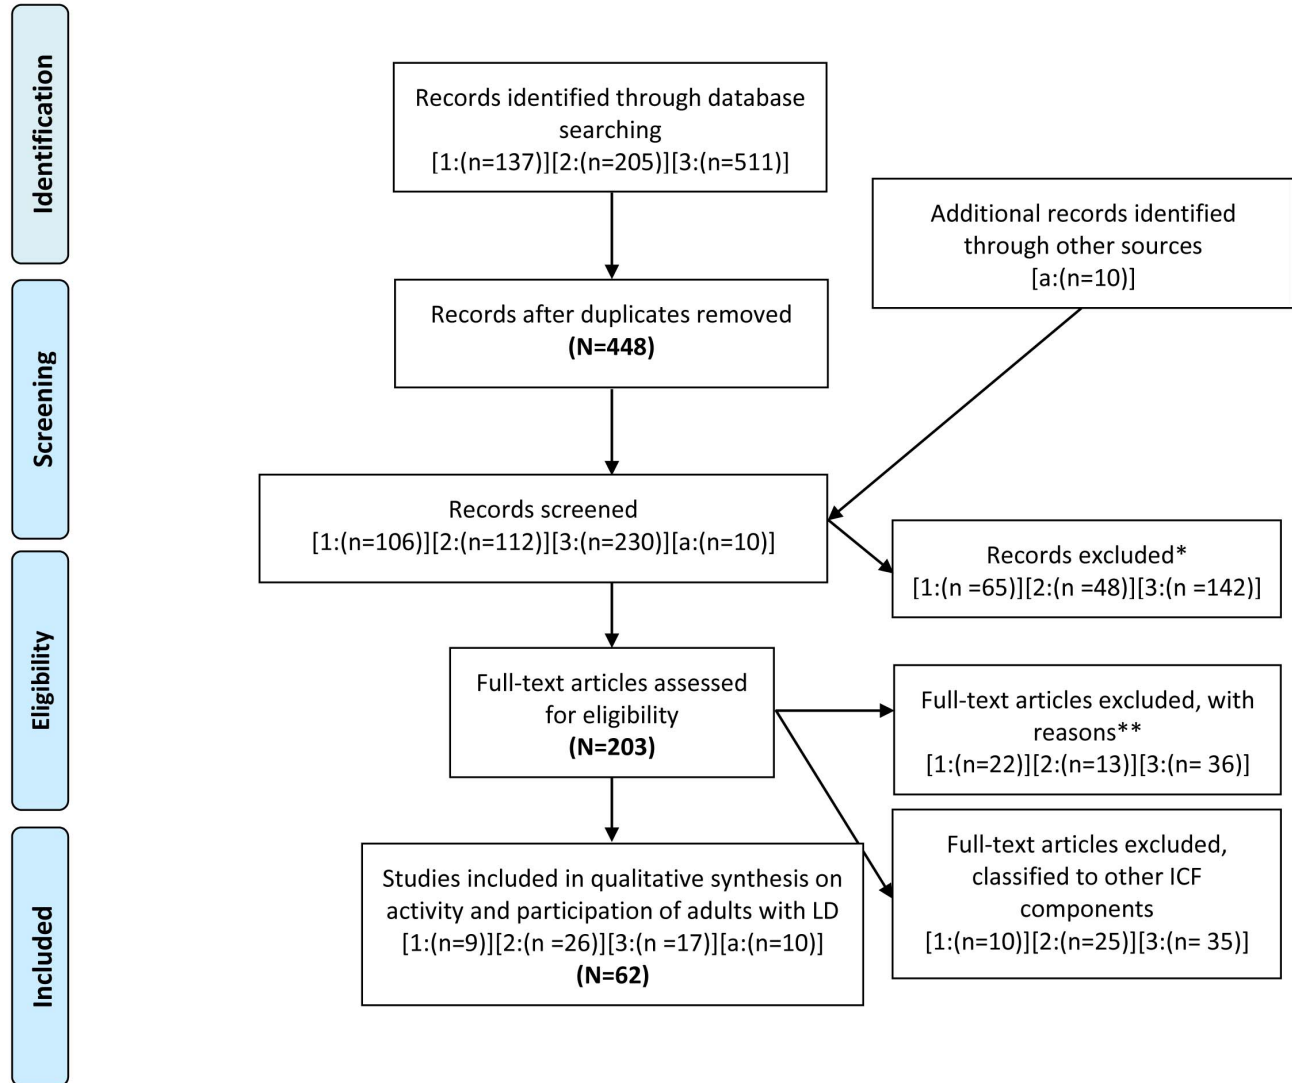

\*For the following reasons: 1. Studies were from the UK/other European countries in which the term LD refers to mental retardation; 2. Studies involved children or adolescents in spite of search limitations; 3. Studies involved other populations (i.e., intellectual and/or physical disabilities, cerebral palsy, autism, geriatric and psychiatric problems); 4. No full text was available to the authors (12 records). \*\* The term learning difficulty/disability was used to describe secondary symptoms of another population.

From: Moher D, Liberati A, Tetzlaff J, Altman DG, The PRISMA Group (2009). Preferred Reporting Items for Systematic Reviews and Meta-Analyses: The PRISMA Statement. PLoS Med 6(6): e1000097. doi:10.1371/journal.pmed1000097

For more information, visit [www.prisma-statement.org](http://www.prisma-statement.org).

**Figure 1. PRISMA 2009 Flow Diagram describing the three stages search process conducted for this literature review.**  
doi:10.1371/journal.pone.0106657.g001

specific LD such as reading, writing, spelling and arithmetic deficits together with DCD, ADHD and Specific Language Impairment (SLI) in a broad perspective termed Atypical Brain Development (ABD) (e.g. [15]). All of these disorders required unique diagnosis and intervention methods to improve daily functions [16].

The on-going discussion about the definition of LD, the broad array of outcomes, the hints regarding difficulties in activity and participation in various life domains and the high co-occurrence of LD with other associated disorders imply that a health perspective, as the International Classification of Functioning, Disability and Health (ICF) model may be useful in order to gain further understanding of the daily needs of this population and consequently to improve their quality of life.

The International Classification of Functioning, Disability and Health (ICF) developed by the World Health Organization [17], is a comprehensive health model designed to classify and assess health and health-related issues and their connection to daily activity and participation. According to the ICF model the term “activity” describes the execution of specific tasks while the term “participation” describes involvement in a range of life situations [17]. The components Activity and Participation are presented separately in the model however the list of domains for these two components is one list (see Figure S1). It is important to note, however, that although activity and participation are central concepts of the ICF model, their translation and implications to research, evaluation and intervention methods among populations with specific diagnoses are still in their primary steps [18].

Following the ICF concepts, LD can be considered as *health conditions* since the term LD is defined as “deficits which influence a person’s ability” (e.g. [1]). More specifically, LD is “caused by deficits in the central nervous system (CNS)...” [1], implying that the origin of LD is in *body structures and functions*. The neurological origin of LD is widely acknowledged and is supported by scientific evidence (e.g. [11,19]). According to LDA Canada (2002), the expressions of LD are affected by interactions between environmental demands and the strengths and needs of the afflicted person [8], meaning *contextual factors* are also related to the levels of functioning and disability as expressed in the daily *activity and participation* of adults with LD.

The purpose of this review is to describe literature regarding the daily activity and participation of adults with LD in various life domains using the ICF model concepts. It is important to note, however, that unlike most of the existing research, which attempts to specify the type of LD they present, in light of the information previously described about the intricacy of LD no specification of LD types will be conducted. All types of specific LD known in the literature will be included in this review and generally related to as LD.

## Methods

### Search strategy

This systematic literature review was carried out according to the guidelines of Preferred Reporting Items for Systematic Reviews and Meta-Analyses (PRISMA) (see Table S1). No protocol exists for this review. The study selection process is summarized in Figure 1. The literature was searched in “PsychInfo”, “Eric” and “PubMed” including all of the available literature up until December 1, 2013. The search was conducted in three stages because it was difficult to obtain relevant results for *adults with LD* as a *primary health condition*. There were no limitations on publication years or types of article. However, only titles and abstracts were searched for keywords, and only peer-

reviewed journal articles were included. The results were limited to English and to the population aged eighteen and over.

### Study inclusion criteria

The following selection criteria were used for the inclusion of studies: (a) the article was written in English; (b) the article related to adults; (c) LD were referred to as the primary health condition of the study population; (d) The main theme covered by the article was related, according to the authors’ view, to one of the domains of activity and participation as described in the ICF model.

### Search procedure

In the first stage, the keywords ‘learning disabilities’ were combined with the keyword “activity” and then with the keyword “participation” based on the ICF core concepts. Most articles were not relevant for adults with LD, but to a variety of other diagnoses such as physical, intellectual and mental disabilities including mental retardation, autism, cerebral palsy, schizophrenia and other disorders. This stage revealed that the keywords ‘learning disabilities’ refer to mental retardation in the UK and some other European countries. In addition some of the results related to children and adolescents in spite of the age limitation.

The keywords for the second stage of the search were chosen according to the common keywords found in use at the first stage of the search. In the second stage the keywords ‘learning disabilities’ were combined with the keyword ‘adults’ and with each of the following keywords: ‘employment’; ‘social skills’; ‘daily performance’; ‘leisure’. In addition, a NOT UK limitation was added to the searches.

However, the second stage of the search also yielded few relevant results. Therefore, in the third stage of the search, ICF terminology was used in order to achieve better coverage of other domains of “activity and participation”. In this stage the keywords ‘learning disabilities’ were combined with the keyword ‘adults’ and with each of the following keywords: ‘knowledge’; ‘tasks’; ‘communication’; ‘mobility’; ‘self-care’; ‘domestic’; ‘interactions’; ‘economic’; ‘community’. In addition, the NOT UK limitation was added to the searches again.

In total, 853 records were identified through the entire search process and only 132 articles (15.47%) were relevant for adults with LD as a primary health condition. These articles included the 10 additional relevant records which were identified through other sources. It is important to note that in spite of the addition of the keyword ‘adults’ and the limitation of NOT UK all stages of this review resulted in irrelevant articles. Throughout the search process, articles from the UK and other countries in which the term LD refers to mental retardation or other major cognitive impairments as well as articles from other places where LD was presented as a secondary diagnosis and titles which dealt with children or adolescents were duly removed.

### Classification according to the ICF components and domains

A procedure of classification according to the ICF components/ domains was conducted after each phase of the search. It appeared that not all articles included in this review could indeed be classified into the ICF component of “activity and participation” or according to the keywords which led to finding them. Therefore, each article was classified firstly according to the main topic being covered into one of the ICF components (“health condition”, “body functions and structures”, “contextual factors” or “activity and participation”).

After this classification only 62 articles out of the 132 articles which related to adults with LD remained classified as related to one of the activity and participation domains (see Table 1 for an overview of these articles). These articles were published between 1981 and 2012. It is important to note that in cases when an article was considered by the authors as relevant to more than one of the ICF components or domains, it was classified according to the main theme it covered as viewed by the authors. Findings of the 62 articles which were found in this review as related to adults with LD and classified into the domains of activity and participation are described below.

## Results

### Activity and participation of adults with LD

The classification and division of the 62 articles into the different domains of activity and participation is presented in Table 1 and will be described below. The percentages reflect the proportional part of each domain in the total of 62 articles (related to as the 100%).

**Major life areas.** The largest group of articles was classified into this domain and included 32 articles [20–51] (51.61%) which related to educational life, work and employment and economic life. In this review, however, these articles will be described as one group on a continuum between the poles of more and less successful adaptation in these life areas.

Exemplary positive results in the “major life areas” domain demonstrated that most adults with LD who participated in a 4-year college program experienced high levels of employment satisfaction (e.g. [33]) and employment self-efficacy (e.g. [39]).

Furthermore, graduates with LD achieved levels of full-time employment, benefits, and salaries that were competitive with statistics of the general American workforce population (e.g. [37]). The same picture was presented in the U.S. and Canada [29].

Some important issues are noteworthy with regard to these “successful” adults with LD: (a) implications of the LD on their work (i.e., difficulties with reading, writing, mathematics, memory) were present in spite of the general success (e.g. [33]); (b) they developed compensatory strategies in order to overcome their difficulties (e.g. [37]); (c) later on they recalled more difficult, less enjoyable educational experiences [32]; (d) a high percentage of the adults with LD who were integrated in competitive and satisfying employment still avoided disclosing their disabilities in their workplaces (e.g. [29]) due to concerns about negative impacts on their relationships with supervisors or co-workers (e.g. [37]).

Less optimistic results in the “major life areas” domain indicated that young adults with LD were significantly less likely to attend 4-year college programs or to graduate from these programs if attending (e.g. [44]) and that significant differences existed between people with LD and their non-disabled peers in favor of the latter with regard to post-college employment outcomes (e.g. [36]). Within a few years in the workforce, the incomes of adults without disabilities exceeded those of adults with LD [31]. Furthermore, in a 20-year follow-up study it was demonstrated that the socio-economic-status of adults with LD was much lower than that of their parents [45].

The findings related to adults with LD who did not attend colleges appeared to be highly variable. The authors explained such educational and work employment outcomes by different personal and contextual factors. For example, it was found that

**Table 1.** Classification of 62 articles to domains of activity and participation according to the ICF model.

| Domains of activity and participation        | No. of Articles | List of Articles (By reference number # and authors)                                                                                                                                                                                                                                                                                                                                                                                                                                                                                                                                                                                                                                                                                                                                                                                                                                                                                                                                                                                                             |
|----------------------------------------------|-----------------|------------------------------------------------------------------------------------------------------------------------------------------------------------------------------------------------------------------------------------------------------------------------------------------------------------------------------------------------------------------------------------------------------------------------------------------------------------------------------------------------------------------------------------------------------------------------------------------------------------------------------------------------------------------------------------------------------------------------------------------------------------------------------------------------------------------------------------------------------------------------------------------------------------------------------------------------------------------------------------------------------------------------------------------------------------------|
| Major Life Areas                             | 32              | {Adelman and Vogel, 1993 #20}; {Cameto, Knokey, and Sanford, 2011 #21}; {Chapman, Tunmer, and Allen, 2003 #22}; {Dickinson and Verbeek, 2002 #23}; {Doren, Lindstrom, Zane, and Johnson, 2007 #24}; {Duquette and Fullarton, 2009 #25}; {Fourqurean et al., 1991 #26}; {Freeman, Stoch, Chan, and Hutchinson, 2004 #27}; {Gerber and Price, 2003 #28}; {Gerber et al., 2004 #29}; {Gerber and Price, 2008 #30}; {Goldstein et al., 1998 #31}; {Goodman, 1987 #32}; {Greenbaum et al., 1996 #33}; {Haring and Lovett, 1990 #34}; {Hoffmann et al., 1987 #35}; {Levine and Edgar, 1995 #36}; {Madaus, 2006 #37}; {Madaus, Gerber, and Price, 2008 #38}; {Madaus, Zhao, and Ruban, 2008 #39}; {Mathis and Roessler, 2010 #40}; {McDonald, 2009 #41}; {Miller et al., 1991 #42}; {Miller, Snider, and Rzonca, 1990 #43}; {Murray et al., 2000 #44}; {Raskind et al., 1999 #45}; {Reis, McGuire, and Neu, 2000 #46}; {Scanlon and Mellard, 2002 #47}; {Shapiro and Lentz, 1991 #48}; {Siegel and Gaylord-Ross, 1991 #49}; {White, 1992 #50}; {Young et al., 2002 #51} |
| General Tasks and Demands                    | 12              | {Gerber, 2012 #3}; {Fafard and Haubrich, 1981 #52}; {Haring, Lovett, and Smith, 1990 #53}; {Lutfig and Muthert, 2005 #54}; {Malcolm et al., 1990 #55}; {Mellard and Hazel, 1992 #56}; {Posthill and Roffman, 1991 #57}; {Shessel and Reiff, 1999 #58}; {Sitlington, Frank, and Carson, 1993 #59}; {Sitlington, 1996 #60}; {Weller, 1994 #61}; {Werner, 1993 #62}                                                                                                                                                                                                                                                                                                                                                                                                                                                                                                                                                                                                                                                                                                 |
| Learning and Applying Knowledge              | 12              | {Bah, Plante, & Gerken, 2009 #63}; {Butler, 1995 #64}; {Coleman, Gregg, McLain, Bellair, 2009 #65}; {Gerber, Schnieders, Paradise, Reiff, Ginsberg, and Popp, 1990 #66}; {Gregg, Bandalos, Coleman, Davis, Robinson, and Blake, 2008 #67}; {Grunow et al., 2006 #68}; {Isaki, Spaulding, and Plante, 2008 #69}; {Magajna et al., 2003 #70}; {McCue, Goldstein, Shelly, and Katz, 1986 #71}; {Mellard and Patterson, 2008 #72}; {Richardson, Harris, Plante, and Gerken, 2006 #73}; {Shafir and Siegel, 1994 #74}                                                                                                                                                                                                                                                                                                                                                                                                                                                                                                                                                 |
| Community, Social and Civic Life             | 3               | {Einat and Einat, 2008 #75}; {Patterson et al., 2012 #76}; {Seo et al., 2008 #77}                                                                                                                                                                                                                                                                                                                                                                                                                                                                                                                                                                                                                                                                                                                                                                                                                                                                                                                                                                                |
| Communication                                | 2               | {Clement-Heist et al., 1992 #78}; {Klein et al., 1988 #79}                                                                                                                                                                                                                                                                                                                                                                                                                                                                                                                                                                                                                                                                                                                                                                                                                                                                                                                                                                                                       |
| Interpersonal Interactions and Relationships | 1               | {Heiman, 2006 #80}                                                                                                                                                                                                                                                                                                                                                                                                                                                                                                                                                                                                                                                                                                                                                                                                                                                                                                                                                                                                                                               |
| Mobility                                     | 0               |                                                                                                                                                                                                                                                                                                                                                                                                                                                                                                                                                                                                                                                                                                                                                                                                                                                                                                                                                                                                                                                                  |
| Self-care                                    | 0               |                                                                                                                                                                                                                                                                                                                                                                                                                                                                                                                                                                                                                                                                                                                                                                                                                                                                                                                                                                                                                                                                  |
| Domestic life                                | 0               |                                                                                                                                                                                                                                                                                                                                                                                                                                                                                                                                                                                                                                                                                                                                                                                                                                                                                                                                                                                                                                                                  |
| <b>Total</b>                                 | <b>62</b>       |                                                                                                                                                                                                                                                                                                                                                                                                                                                                                                                                                                                                                                                                                                                                                                                                                                                                                                                                                                                                                                                                  |

doi:10.1371/journal.pone.0106657.t001

personal factors (e.g., financial autonomy, peer influence, gender) and environmental community factors (e.g., use of community resources, community mobility) differed among groups of young adults with LD who participated in alternative postsecondary education experiences [42]. It was mentioned that employment success was more likely among young adults with LD with high math abilities who were employed during high-school and whose parents actively participated in their education [26]. Furthermore, gender and their own belief in change were significant predictors of hourly wages of employed participants with LD, while career-related knowledge was a significant predictor of job satisfaction [40].

The last results described in the domain of “major life areas” are those of special education high-school graduates. These results are also varied and demonstrated that between 59% [34] and 90% [48] of the subjects were competitively employed.

**General tasks and demands.** 12 articles [3,52–62] (19.35%) were classified into this domain. These articles presented a decentralized mixture of results which related to performing daily routines, handling stress and other psychological demands of daily life for adults with LD according to the definition of this domain [17]. The main theme of these articles was the level of adaptation of adults with LD to the general tasks and demands of adult life.

A successful adaptation of adults with LD to the “general tasks and demands” of adult life was described, for example, by Werner (1993) who traced the development of 22 children with LD and 22 matched controls. Most subjects with LD made successful adaptations to adult life as expressed in data regarding their marriages, divorces, and employment rates, which were similar to the cohort as a whole [62]. Other articles described less successful adaptations of people with LD to the “general tasks and demands” of adulthood. For example: Malcolm, Polatajko and Simons (1990) found that 83.8% (N = 80) reported problems in at least one activity of daily living, mainly in daily organization, banking, time and home management [55]. In another example, Shessel and Reiff (1999) examined the life experiences of 14 adults with LD. Negative impacts of the LD included difficulties in daily living, social isolation, and damage to emotional health [58].

**Learning and applying knowledge.** 12 articles [63–74] (19.35%) were classified in this domain. These articles focused mainly on the academic characteristics of people with LD. For example, Grunow, Spaulding, Gomez and Plante (2006) compared adults with and without LD and demonstrated that the group with LD showed poorer sensitivity to statistical information in speech input [68]. Magajna, Kavkler and Ortar-krizaj (2003) demonstrated significantly lower literacy proficiency among a group with self-reported LD [70] and Mellard and Patterson (2008) found that specific LD contributed significantly to variance in reading levels when controlling for age and IQ [72].

**Community, social and civic life.** Three articles [75–77] (4.83%) were classified into this domain and described extremely different results concerning adults with LD. On one pole, Seo, Abbott, and Hawkins (2008) compared adults with and without LD (N = 571) and found no significant differences between the groups at age 24 in the areas of schooling, employment, income, receipt of public aid and involvement in crime [77]. On the other pole Einat and Einat (2008) reported high rates of LD (69.6%) among a random sample of 89 Israeli inmates. In addition, significant relationships were found between LD, number of years of education and the age of the onset of criminal activity [75]. In another example, it was found that LD were overrepresented among a sample of homeless adults (N = 133) [76]. In this study LD during childhood had significant relationships with self-

reported educational attainment and lifetime duration of homelessness as well as with a range of problems of mental health, physical health and substance use [76].

**Communication.** Two articles [78,79] (3.22%) were classified into this domain. Klein, Moses, and Altman (1988) investigated responses to communication-assessment questionnaires. Results indicated that young adult students with severe LD and their vocational educators had similar perceptions of their communication performance. All rated problem solving abilities lower than verbal expression, comprehension, and social communication abilities. In addition all participants rated social communication abilities of the students with LD as lower than comprehension [79]. Clement-Heist, Siegel, and Gaylord-Ross (1992) described a study of multiple-baseline design conducted to investigate the effects of measured behaviors on four high-school seniors before and after vocational social skills training [78]. The authors concluded that their model was a powerful way to promote generalization of behavioral communicative skills, yet the small sample size limits the validity of such a conclusion.

**Interpersonal interactions and relationships.** One article (1.61%) was classified in this domain. Heiman (2006) reported a significant difference in perceived social support, in favor of students without LD (n = 191) compared to their controls (n = 190) [80].

**Mobility; Self-care; Domestic life.** No articles at all (0%) were classified into these domains. However, with regard to “mobility” some data could be gathered from two articles which were classified with the domain of general tasks and demands. Haring, Lovett, and Smith (1990) found that 69% of a random sample of students with LD (n = 64) had driver’s licenses and cars [53], while Luftig and Muthert (2005) found even higher rates of 94% in a small sample of 17 subjects with LD [54]. Regarding “domestic life”, Haring et al. (1990) found that 79% out of the randomly selected sample of graduates with LD (n = 64) with a mean age of 21 years, reside with their parents or other relatives. The authors suggested that the subjects’ involvement and/or independence in domestic life activities was still limited [53].

## Discussion

The aim of this review was to survey the literature on the *activity* and *participation* of adults with LD based on the International Classification of Functioning, Disability and Health (ICF) concepts. Through this procedure of reviewing literature, it was found that the search for articles on *activity and participation* of adults with LD generally resulted in a small percent of actual relevant results to the population of adults with LD as a primary health condition. The difficulty in finding relevant literature may be attributed not only to the use of ICF terms, but also to the ongoing discussion of the essence of LD which includes its definitions (e.g. [2]), debated identification methods (e.g. [81,82]) and differences in research samples (e.g. [83]). Furthermore, it has been recognized that current literature on adults with LD is limited (e.g. [3,77]). The difficulty in defining LD is intensified in practice due to the complexity of the issue of LD as described in the beginning of this review. Concurring associated disorders and health conditions which affect the daily *activity and participation* of adults with LD lead to the involvement of different professionals in the planning of intervention programs for the population with LD and their application. The large variability in life outcomes of adults with LD as described in this review matches what is known about the complexity of the issue of LD.

In the current literature review, most of the articles that were classified in the component of *activity and participation* related to

*learning and applying knowledge* and to the *major life areas* of education and employment. However, identification of relevant literature to other activity and participation domains was a difficult task even though some articles which examined *activity and participation* among adults in mixed life areas demonstrated that deficiencies in *activity and participation* indeed exist in various areas in the lives of adults with LD (e.g. [55,35,84]). Yet the limited literature revealed only hints about what happens to this population and further extensive investigation is still required.

As described in the beginning of this review, the common definitions and identification methods of LD are based on specific difficulties of people with LD in academic studies (e.g. [6]). It is possible, therefore, that due to the focus of the definitions on the academic deficiencies of this population, research and practice have been directed over the years to the characteristics of *learning and applying knowledge* and to the *major life areas* of academic studies, to employment and economic outcomes, while other important life domains were left out of the spotlight of research and practice among adults with LD.

According to Gerber (2012) the main reason it is difficult to investigate the variety of life outcomes of people with LD through adulthood is that the field has not yet adopted a conceptual model to investigate these issues [3]. In light of the findings of this review, it is therefore suggested that the ICF terminology could be used to describe adults with LD in a manner that may generate a common language among the various professions and help researchers and clinicians working with this population to recognize that an examination of the whole picture is required in order to understand it fully. A better understanding of daily activity and participation of adults with LD may contribute to better-planned programs, thus improving their general activity and participation and perceived quality of life.

### Limitations and future research directions

This review has limitations which can direct future studies. Search words derived directly from the new concepts of the ICF model may not have led to the required results (e.g. [85]). Selecting more common search words, as was done in the second phase of the search, may have resulted in more relevant articles for this review. In addition, the search words in the second phase of the search were derived from the results of the first phase and may not have encompassed all of the domains of activity and participation

### References

1. Kavale KA, Forness SR (2000) What definitions of learning disabilities say and don't say – a critical analysis. *J Learn Disabil* 33: 239–256.
2. Brueggemann AE, Kamphaus RW, Dombrowski SC (2008) An impairment model of learning disability diagnosis. *Prof Psychol Res Pr* 39: 424–430.
3. Gerber PJ (2012) The impact of learning disabilities on adulthood - a review of the evidenced-based literature for research and practice in adult education. *J Learn Disabil* 45: 31–46.
4. American Psychiatric Association (1994) Diagnostic and statistical manual of mental disorders: DSM IV (4<sup>th</sup> Ed.). Washington, D.C.; American Psychiatric Association.
5. World Health Organization (WHO) (2007) International statistical classification of diseases and related health problems (10<sup>th</sup> revision). Available: <http://apps.who.int/classifications/apps/icd/icd10online>.
6. Scanlon D (2013) Specific learning disability and its newest definition: which is comprehensive and which is insufficient? *J Learn Disabil* 46: 26–33.
7. Elksnin LK, Elksnin N (2004) The social-emotional side of learning disabilities. *Learn Disabil Q* 27: 3–8.
8. Learning Disabilities Association of Canada (LDA Canada) (2002) Official definition of learning disabilities. Available: <http://www.ldac-acta.ca/learn-more/ld-defined>.
9. Cavendish W (2013) Identification of learning disabilities: implications of proposed DSM-5 criteria for school-based assessment. *J Learn Disabil* 46: 52–57.
10. Roffman AJ (2000) Meeting the challenges of learning disabilities in adulthood. Baltimore, Maryland: Paul H. Brooks Publishing Co.

in the ICF model. Therefore it is suggested that a comprehensive preliminary study to identify additional relevant search words may lead to some further relevant results for other domains of activity and participation.

### Conclusions and Implications

This article described a review of the literature on the activity and participation of adults with LD while using ICF concepts. Out of 853 records which were identified, 458 records were screened. Only 135 records were relevant for adults with LD as a primary health condition out of which 62 related to *activity and participation* of adults with LD.

This literature review demonstrated that adults with LD may experience limitations and restrictions in activity and participation in domains of communication, interpersonal interactions and community, social and civic life. However, much of the literature focused on their activity and participation in the life areas of education and employment. Therefore this review proposed that the focus of the LD definitions on academic deficiencies may have led research and practice to concentrate on these areas, while leaving other life domains such as mobility, self-care and domestic life almost completely untouched.

It was suggested that a use of the ICF activity and participation perspective may help to establish a common language and a broad understanding of the population of adults with LD among the different professionals who are involved in the evaluation and intervention programming of the LD population in order to better address their needs. Furthermore, this perspective may imply that a larger picture still needs to be revealed.

### Supporting Information

**Figure S1 Components of the ICF model (WHO, 2001).** (TIF)

**Table S1 PRISMA 2009 Checklist.** (DOC)

### Author Contributions

Conceived and designed the experiments: KS SR. Performed the experiments: KS. Analyzed the data: KS SR. Contributed to the writing of the manuscript: KS SR.

11. Mangina CA, Beuzeron-Mangina H (2009) Similarities and differences between learning abilities, “pure” learning disabilities, “pure” ADHD and comorbid ADHD with learning disabilities. *Int J Psychophysiol* 73: 170–177.
12. Jongmans MJ, Smits-Engelsman BCM, Schoemaker MM (2003) Consequences of co-morbidity of developmental coordination disorders and learning disabilities for severity and pattern of perceptual-motor dysfunction. *J Learn Disabil* 36: 528–537.
13. Bryan T, Burstein K, Ergul C (2004) The social-emotional side of learning disabilities: a science-based presentation of the state of the art. *Learn Disabil Q* 27: 45–51.
14. Wilson AM, Armstrong CD, Furrice A, Walcot E (2009) The mental health of Canadians with self-reported learning disabilities. *J Learn Disabil* 42: 24–40.
15. Gilger JW, Kaplan BJ (2001) Atypical brain development: a conceptual framework for understanding developmental learning disabilities. *Dev Neuropsychol* 20: 465–481.
16. Josman N, Rosenblum S (2011) A metacognitive model for children with atypical brain development. In: Katz N, Editor. *Cognition, occupation, and participation across the life span* 3rd Ed. Bethesda: AOTA Press, Inc. pp. 223–247.
17. World Health Organization (2001) International classification of functioning, disability and health. Geneva: World Health Organization.
18. Dijkers MP (2010) Issues in the conceptualization and measurement of participation: an overview. *Arch Phys Med Rehabil* 91: 5–16.
19. Hynd GW, Marshall R, Gonzalez J (1991) Learning disabilities and presumed central nervous system dysfunction. *Learn Disabil Q* 14: 283–296.

20. Adelman PB, Vogel SA (1993) Issues in the employment of adults with learning disabilities. *Learn Disabil Q* 16: 219–232.
21. Cameto R, Knokey AM, Sanford C (2011) Participation in postsecondary education of young adults with learning disabilities: findings from NLTS2. *Learn Disabil* 17: 45–54.
22. Chapman JW, Tunmer WE, Allen R (2003) Findings from the international adult literacy survey on the incidence and correlates of learning disabilities in New Zealand: is something rotten in the state of New Zealand? *Dyslexia*, 9: 75–98.
23. Dickinson DL, Verbeek RL (2002) Wage differentials between college graduates with and without learning disabilities. *J Learn Disabil* 35: 175–184.
24. Doren B, Lindstrom L, Zane C, Johnson P (2007) The role of program and alterable personal factors in post-school employment outcomes. *CDEI? Career Development for Exceptional Individuals*, 30: 171–183.
25. Duquette C, Fullerton S (2009) “With an LD you’re always mediocre and expect to be mediocre”: Perceptions of adults recently diagnosed with learning disabilities. *Exceptionality Education International?* 19: 51–71.
26. Fourqurean JM, Meisgeier C, Swank PR, Williams RE (1991) Correlates of postsecondary employment outcomes for young adults with learning disabilities. *J Learn Disabil* 24: 400–405.
27. Freeman JG, Stoch SA, Chan JSN, Hutchinson NL (2004) Academic resilience: a retrospective study of adults with learning difficulties. *Alberta J Educ Res* 50: 5–21.
28. Gerber PJ, Price LA (2003) Persons with learning disabilities in the workplace: what we know so far in the Americans with Disabilities Act Era. *Learn Disabil Res Pract* 18: 132–136.
29. Gerber PJ, Price LA, Mulligan R, Shessel I (2004) Beyond transition: a comparison of the employment experiences of American and Canadian adults with LD. *J Learn Disabil* 37: 283–291.
30. Gerber PJ, Price LA (2008) Self-disclosure and adults with learning disabilities: practical ideas about a complex process. *Learning Disabilities: A Multidisciplinary Journal?* 15(1): 21–24.
31. Goldstein DE, Murray C, Edgar E (1998) Employment earnings and hours of high-school graduates with learning disabilities through the first decade after graduation. *Learn Disabil Res Pract* 13: 53–64.
32. Goodman NC (1987) Girls with learning disabilities and their sisters: how are they faring in adulthood? *J Clin Child Psychol* 16: 290–300.
33. Greenbaum B, Graham S, Scales W (1996) Adults with learning disabilities: occupational and social status after college. *J Learn Disabil* 29: 167–173.
34. Haring KA, Lovett DL (1990) A follow-up study of special education graduates. *J Spec Educ* 23: 463–477.
35. Hoffman EJ, Sheldon KL, Minskoff EH, Sautter SW, Steidle EF, et al. (1987) Needs of learning disabled adults. *J Learn Disabil* 20: 43–52.
36. Levine P, Edgar E (1995) An analysis by gender of long-term post-school outcomes for youth with and without disabilities. *Except Child* 61: 282–301.
37. Madaus JW (2006) Employment outcomes of university graduates with learning disabilities. *Learn Disabil Q* 29: 19–31.
38. Madaus JW, Gerber PJ, Price LA (2008) Adults with learning disabilities in the workforce: lessons for secondary transition programs. *Learn Disabil Res Pract* 23: 148–153.
39. Madaus JW, Zhao J, Ruban L (2008) Employment satisfaction of university graduates with learning disabilities. *Remedial Spec Educ* 29: 323–332.
40. Mathis LM, Roessler RT (2010) The relationship between career-related knowledge, self-esteem, locus of control, gender, and employment outcomes among individuals with learning disabilities. *Journal of Applied Rehabilitation Counseling?* 41: 3–1.
41. McDonald SJ (2009) Windows of reflection: conceptualizing dyslexia using the social model of disability. *Dyslexia* 15: 347–362.
42. Miller RJ, Rzonca C, Snider B (1991) Variables related to the type of postsecondary education experience chosen by young adults with learning disabilities. *J Learn Disabil* 24: 188–191.
43. Miller RJ, Snider B, Rzonca C (1990) Variables related to the decision of young adults with learning disabilities to participate in postsecondary education. *J Learn Disabil* 23: 349–354.
44. Murray C, Goldstein DE, Nourse S, Edgar E (2000) The postsecondary school attendance and completion rates of high school graduates with learning disabilities. *Learn Disabil Res Pract* 15: 119–127.
45. Raskind MH, Goldberg RJ, Higgins EL, Herman KL (1999) Patterns of change and predictors of success in individuals with learning disabilities: results from a twenty-year longitudinal study. *Learn Disabil Res Pract* 14: 35–49.
46. Reis SM, McGuire JM, Neu TW (2000) Compensation strategies used by high-ability students with learning disabilities who succeed in college. *Gift Child Q* 44: 123–134.
47. Scanlon D, Mellard DF (2002) Academic and participation profiles of school-age dropouts with and without disabilities. *Except Child* 68: 239–258.
48. Shapiro ES, Lentz FE (1991) Vocational-technical programs: follow-up of students with learning disabilities. *Except Child* 58: 47–59.
49. Siegel S, Gaylord-Ross R (1991) Factors associated with employment success among youths with learning disabilities. *J Learn Disabil* 24: 40–47.
50. White WJ (1992) The post-school adjustment of persons with learning disabilities: current status and future projections. *J Learn Disabil* 25: 448–456.
51. Young AR, Beitchman JH, Johnson C, Douglas L, Atkinson L, Escobar M, Wilson B (2002) Young adult academic outcomes in a longitudinal sample of early identified language impaired and control children. *J Child Psychol Psychiatry* 43: 635–45.
52. Fafard MB, Haubrich PA (1981) Vocational and social adjustment of learning disabled young adults: a follow-up study. *Learn Disabil Q* 4: 122–130.
53. Haring KA, Lovett DL, Smith DD (1990) A follow-up study of recent special education graduates of learning disabilities programs. *J Learn Disabil* 23: 108–113.
54. Luftig RL, Muthert D (2005) Patterns of employment and independent living of adult graduates with learning disabilities and mental retardation of an inclusionary high school vocational program. *Res Dev Disabil* 26: 317–325.
55. Malcolm CB, Polatajko HJ, Simons J (1990) A descriptive study of adults with suspected learning disabilities. *J Learn Disabil* 23: 518–520.
56. Mellard DF, Hazel JS (1992) Social competencies as a pathway to successful life transitions. *Learn Disabil Q* 15: 251–271.
57. Posthill SM, Roffman AJ (1991) The impact of a transitional training program for young adults with learning disabilities. *J Learn Disabil* 24: 619–629.
58. Shessel I, Reiff FB (1999) Experiences of adults with learning disabilities: positive and negative impacts and outcomes. *Learn Disabil Q* 22: 305–316.
59. Sitlington PL, Frank AR, Carson R (1993) Adult adjustment among high-school graduates with mild disabilities. *Except Child* 59: 221–233.
60. Sitlington PL (1996) Transition to living: the neglected component of transition programming for individuals with learning disabilities. *J Learn Disabil* 29: 31–39.
61. Weller C, Watteyne L, Herbert M, Crelly C (1994) Adaptive behavior of adults and young adults with learning disabilities. *Learn Disabil Q* 17: 282–295.
62. Werner EE (1993) Risk and resilience in individuals with learning disabilities: lessons learned from the Kauai longitudinal study. *Learn Disabil Res Pract* 8: 28–34.
63. Bahl M, Plante E, Gerken LA (2009) Processing prosodic structure by adults with language-based learning disability. *J Commun Disord* 42: 313–323.
64. Butler DL (1995) Promoting strategic learning by postsecondary students with learning disabilities. *J Learn Disabil* 28: 170–190.
65. Coleman C, Gregg N, McLain L, Bellair LW (2009) A comparison of spelling performance across young adults with and without dyslexia. *Assess Eff Interv* 34: 94–105.
66. Gerber PJ, Schnieders CA, Paradise LV, Reiff HB, Ginsberg RJ, Popp PA (1990) Persisting problems of adults with learning disabilities: self-reported comparisons from their school-age and adult years. *J Learn Disabil* 23: 570–573.
67. Gregg N, Bandalos DL, Coleman C, Davis JM, Robinson K, et al. (2008) The validity of a battery of phonemic and orthographic awareness tasks for adults with and without dyslexia and attention deficit/hyperactivity disorder. *Remedial Spec Educ* 29: 175–190.
68. Grunow H, Spaulding TJ, Gomez RL, Plante E (2006) The effects of variation on learning word order rules by adults with and without language-based learning disabilities. *J Commun Disord* 39: 158–170.
69. Isaki E, Spaulding TJ, Plante E (2008) Contributions of language and memory demands to verbal memory performance in language-learning disabilities. *J Commun Disord* 41: 512–530.
70. Magajna L, Kavkler M, Ortar-krizaj M (2003) Adults with self-reported learning disabilities in Slovenia: findings from the international adult literacy survey on the incidence and correlates of learning disabilities in Slovenia. *Dyslexia* 9: 229–251.
71. McCue M, Goldstein G, Shelly C, Katz L (1986) Cognitive profiles of some subtypes of learning disabled adults. *Arch Clin Neuropsychol* 1: 13–23.
72. Mellard DF, Patterson MB (2008) Contrasting adult literacy learners with and without specific learning disabilities. *Remedial Spec Educ* 29: 133–144.
73. Richardson J, Harris L, Plante E, Gerken LA (2006) Subcategory learning in normal and language learning-disabled adults: How much information do they need? *J Speech Lang Hear Res* 49: 1257–1266.
74. Shafrir U, Siegel LS (1994) Subtypes of learning disabilities in adolescents and adults. *J Learn Disabil* 27: 123–134.
75. Einat T, Einat A (2008) Learning disabilities and delinquency – a study of Israeli prison inmates. *Int J Offender Ther Comp Criminol* 52: 416–434.
76. Patterson ML, Moniruzzaman A, Frankish CJ, Somers JM (2012) Missed opportunities: childhood learning disabilities as early indicators of risk among homeless adults with mental illness in Vancouver, British Columbia. *BMJ Open* 2: 1–9.
77. Seo Y, Abbott RD, Hawkins JD (2008) Outcome status of students with learning disabilities at ages 21 and 24. *J Learn Disabil* 41: 300–314.
78. Clement-Heist K, Siegel S, Gaylord-Ross R (1992) Simulated and in-situ vocational social skills training for youths with learning disabilities. *Except Child* 58: 336–345.
79. Klein HB, Moses N, Altman E (1988) Communication of adults with learning disabilities: self and others’ perceptions. *J Commun Disord* 21: 423–36.
80. Heiman T (2006) Assessing learning styles among students with and without learning disabilities at a distance-learning university. *Learn Disabil Q* 29: 55–63.
81. Kavale KA, Spaulding LS, Beam AP (2009) A time to define: making the specific learning disability definition prescribe specific learning disability. *Learn Disabil Q* 32: 39–48.
82. Sparks RL, Lovett BJ (2009) Objective criteria for classification of postsecondary students as learning disabled: effects on prevalence rates and group characteristics. *J Learn Disabil* 42: 230–239.

83. Dombrowski SC, Kamphaus RW, Reynolds CR (2004) After the demise of the discrepancy: proposed learning disabilities diagnostic criteria. *Prof Psychol Res Pr* 35: 364–372.
84. Jarvis PA, Justice EM (1992) Social sensitivity in adolescents and adults with learning disabilities. *Adolescence* 27: 977–988.
85. Resnik L, Plow MA (2009) Measuring participation as defined by the international classification of functioning, disability and health: an evaluation of existing measures. *Arch Phys Med Rehabil* 90: 856–866.
